# Supplementary material for: Atmospheric ammonia variability and link with PM formation: a case study over the Paris area
Source: Copernicus journal article supplement (doi:10.5194/acp-2019-138), 2019-03-25
Supplement: Supplementary file 1 [file acp-2019-138-supplement.pdf]

- 1 **Supplement information**
- 2 Figure S1: Bar plots of monthly mean  $\text{NH}_3$  total columns derived from IASI (panel a), total
- 3 precipitation (panel b) and skin temperature (panel c) derived from ECMWF from March to
- 4 August, plotted in different colors for the different years of measurements from 2008 to 2017.

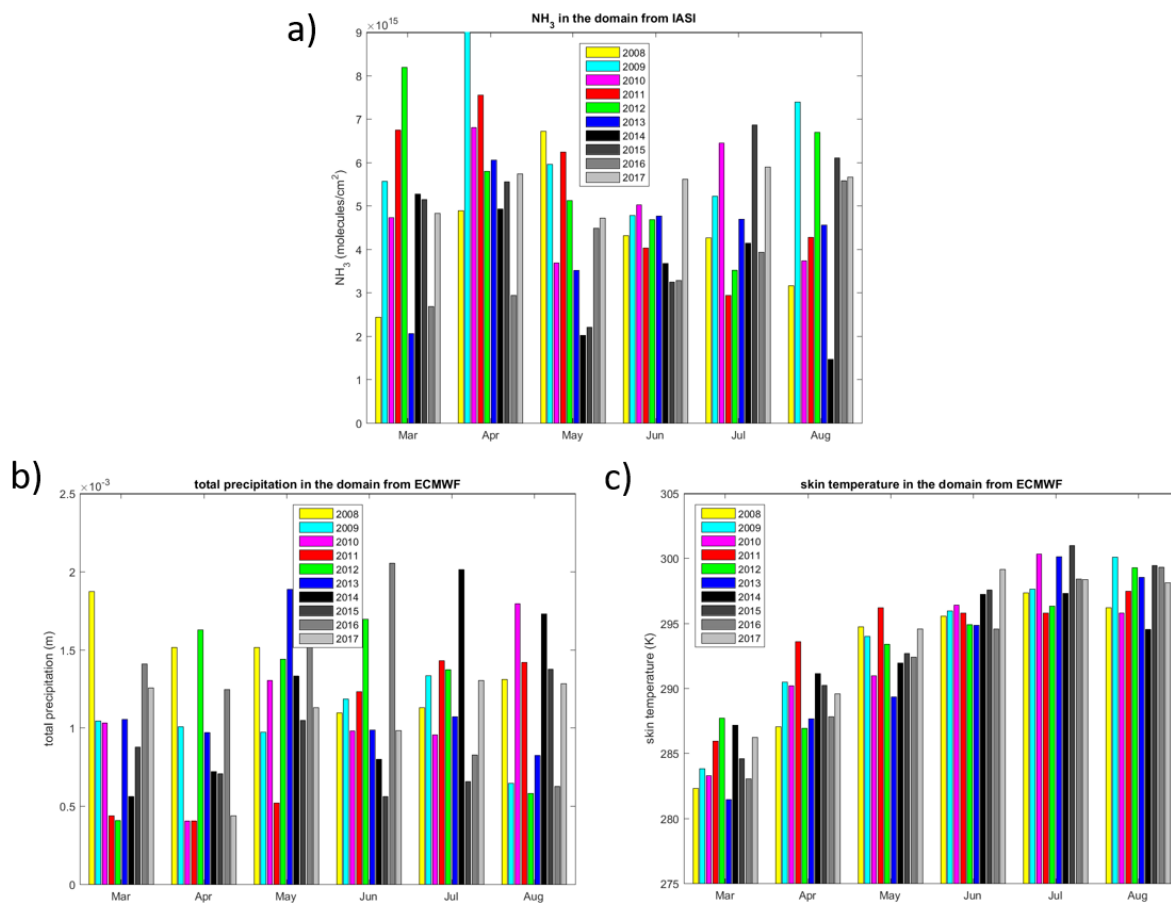

5

6 Figure S2: Difference (model - observations) between the standardized NH<sub>3</sub> columns derived  
7 from the satellite instruments (IASI - left panels, and CrIS - right panels) and the corresponding  
8 NH<sub>3</sub> columns derived from the CHIMERE model for March-April 2014 and 2015.

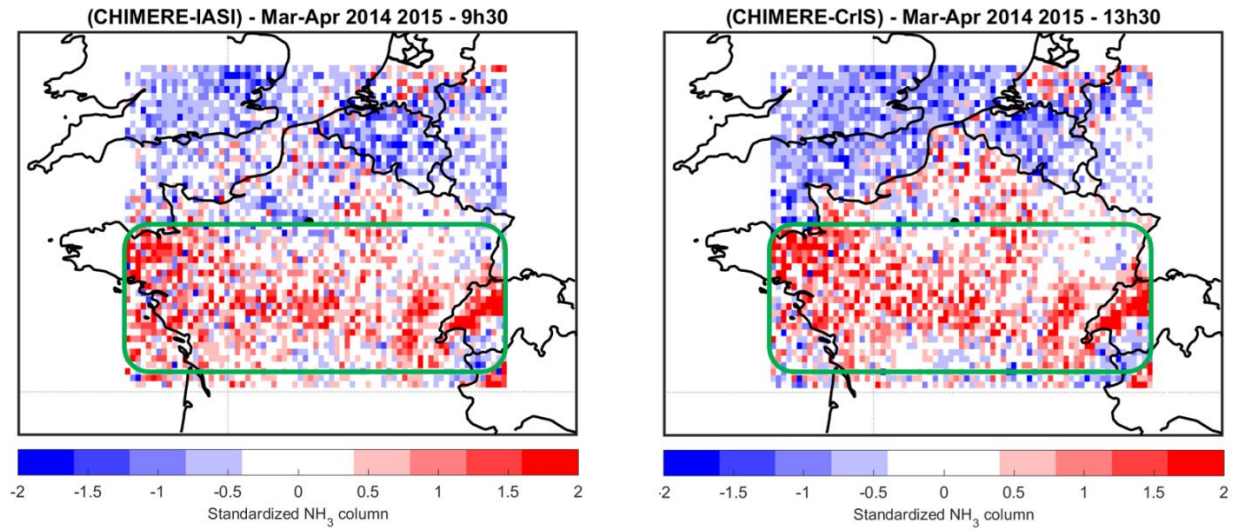

9

10

11 Figure S3: 10-years of monthly mean concentrations of NH<sub>3</sub> total columns derived from IASI in  
12 orange and PM<sub>2.5</sub> derived from the Airparif network in red from 2008 to 2017.

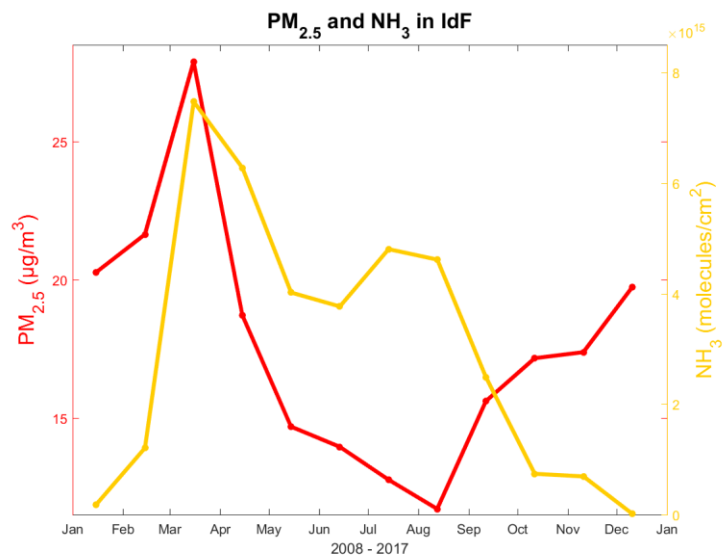

13

14
